# Supplementary material for: Metabolomic Evaluation of Scenedesmus sp. as a Feed Ingredient Revealed Dose-Dependent Effects on Redox Balance, Intermediary and Microbial Metabolism in a Mouse Model
Source: PubMed Central journal article supplement (PMC6770930; doi:10.3390/nu11091971), 2019-08-21

# Metabolomic evaluation of *Scenedesmus* sp. as a feed ingredient revealed dose-dependent effects on redox balance, intermediary and microbial metabolism in a mouse model

Yiwei Ma<sup>1</sup>, Wenguang Zhou<sup>2</sup>, Paul Chen<sup>2</sup>, Pedro E. Urriola<sup>3</sup>, Gerald C. Shurson<sup>3</sup>, Roger Ruan<sup>2\*</sup>, Chi Chen<sup>1\*</sup>

<sup>1</sup> Department of Food Science and Nutrition, University of Minnesota, St. Paul, MN 55108; maxxx792@umn.edu (Y.M.); chichen@umn.edu (C.C.)

<sup>2</sup> Department of Bioproducts and Biosystems Engineering, University of Minnesota, St. Paul, MN 55108; wgzhou@ncu.edu.cn (W.Z.); chenx088@umn.edu (P.C.); ruanx001@umn.edu (R.R.)

<sup>3</sup> Department of Animal Science, University of Minnesota, St. Paul, MN 55108; urrio001@umn.edu (P.U.); shurs001@umn.edu (G.S.)

\* Correspondence: chichen@umn.edu; Tel.: +1-612-624-7704 (C.C.); ruanx001@umn.edu (R.R.)

## SUPPLEMENTARY DATA

**Table S1. Chemicals.** All reagents and chemicals are listed alphabetically.

| Reagent                                | Vendor                 | Catalog No.      |
|----------------------------------------|------------------------|------------------|
| Acetonitrile (ACN)                     | Fisher Scientific      | A955-5           |
| n-Butanol                              | Sigma-Aldrich          | B7906            |
| 2-2'-Dipyridyl disulfide (DPDS)        | MP Biomedicals, LLC    | 150987           |
| 2-Hydrazinoquinoline (HQ)              | Alfa Aesar             | H50700           |
| Triphenylphosphine (TPP)               | Alfa Aesar             | 14112            |
| Standard                               | Vendor                 | Catalog No.      |
| Acetic acid                            | Mallinckrodt Chemicals | V193-06          |
| Acetylcarnitine, HCl                   | Acros Organics         | 342390010        |
| Adenine, 1H-Purin-6-amine              | Ark Pharm              | AK-96693         |
| Adenosine                              | Alfa Aesar             | A10781           |
| Adenosine-5'-monophosphoric acid (AMP) | Alfa Aesar             | L14051           |
| Adenylosuccinic acid                   | Sigma                  | A5028            |
| Amino acid mixture (acidic)            | Sigma-Aldrich          | A6407            |
| Amino acid mixture (basic)             | Sigma-Aldrich          | A6282            |
| Butyric acid                           | Alfa Aesar             | L13189 or 36544  |
| Carnitine                              | Acros                  | 108450250        |
| Choline chloride                       | US Biochemical Corp    | 22559            |
| Dimethylarginine                       | Enzo Life Science      | Alx-106-005-M005 |
| Glutathione, oxidized                  | Sigma-Aldrich          | G4251            |
| Glutathione, reduced                   | Sigma-Aldrich          | G4376            |
| Heptaldehyde, 1-heptanal               | Acros organics         | 120320500        |

|                                                 |                             |             |
|-------------------------------------------------|-----------------------------|-------------|
| Hexanal (hexaldehyde)                           | Alfa Aesar                  | A16265-22   |
| Indole-3-carboxylic acid                        | Acros Organics              | 307610010   |
| Lithocholic acid                                | Sigma                       | L6250-10G   |
| 4-Methyl hexanoic acid                          | Ultra Scientific            | FLBA-022    |
| 4-Methyl pentanoic acid                         | Bedoukian Research          | 476         |
| 5'-Methylthioadenosine                          | Sigma-Aldrich               | D5011       |
| $\beta$ -Muricholic acid                        | Steraloids                  | C1895-000   |
| Niacinamide (Nicotinamide, niacin)              | Sigma                       | N3376       |
| Nicotinamide adenine dinucleotide (NAD)         | Sigma-Aldrich               | N7004       |
| Octanedioic acid, suberic acid                  | Ark Pharm                   | AK-73011    |
| Pantothenic acid                                | Alfa Aesar                  | A16609-22   |
| Propionic acid                                  | Alfa Aesar                  | L04210      |
| 2-Pyrrolidone-5-carboxylic acid (pyroglutamate) | Acros Organics              | 232930050   |
| Riboflavin                                      | Alfa Aesar                  | A11764      |
| Riboflavin-5'-phosphate sodium salt dihydrate   | Chem-IMPEX<br>International | Cat#00259   |
| Sebacic acid                                    | TCI America                 | S0022       |
| Sodium Deoxycholate                             | Sigma-Aldrich               | D6750-10G   |
| Sodium taurochenodeoxycholate                   | Sigma                       | T6260-25mg  |
| Sodium taurocholate hydrate                     | Sigma                       | T4009-250mg |
| Sodium taurodeoxycholate hydrate                | Sigma                       | T0875-1G    |
| Taurocholic acid                                | Acros Organics              | 230370010   |
| Valeric acid                                    | TCI America                 | V0003       |

---

**Table S2. Diet composition.**

|                         | CTL   | 5% <i>Scenedesmus</i> | 20% <i>Scenedesmus</i> |
|-------------------------|-------|-----------------------|------------------------|
| Diet composition (g/kg) |       |                       |                        |
| <i>Scenedesmus</i>      | 0     | 50                    | 200                    |
| AIN93G                  | 1000  | 950                   | 800                    |
| Nutrient content (g/kg) |       |                       |                        |
| Crude protein           | 197.6 | 213.2                 | 263.4                  |
| ADF                     | 36.7  | 35.2                  | 30.6                   |
| aNDF                    | 47.3  | 46.3                  | 43.2                   |
| Calcium                 | 5.7   | 5.8                   | 6                      |
| Phosphorus              | 3.1   | 3.3                   | 4                      |
| Magnesium               | 0.5   | 0.6                   | 0.7                    |
| Potassium               | 4.3   | 4.4                   | 4.7                    |

\*Calculated based on the proximate analysis of AIN93G and algae powder from Dairyland Lab, Inc

**Table S3. The sequences of primers used in the real-time PCR analysis of gene expression.**

| Gene         | Forward primer (from 5' to 3') | Reverse primer (from 5' to 3') |
|--------------|--------------------------------|--------------------------------|
| <i>Acot1</i> | TTGCACATGCGGTGCACGAG           | AGGAAAGGGTCCAGGTTCTGGG         |
| <i>Cpt1</i>  | ACACCACTGGCCGCATGTCAAG         | TGCCGTGCTCTGCAAACATCCA         |
| <i>Cpt2</i>  | TGCCCAGGCTGCCTATCCCTAA         | GCAGCTCCTTCCCAATGCCGTT         |
| <i>Pemt</i>  | TGAGCCAGCCCAAGATGGAG           | TCCAGCACGCTGAAGGGAAA           |
| <i>Gclc</i>  | TGGCCACTATCTGCCCAATT           | GTCTGACACGTAGCCTCGGTAA         |
| <i>Gclm</i>  | TGGAGTTCCCAAATCAGCCCC          | GCAACTCCAAGGACGGAGCA           |
| <i>Actin</i> | TCCATCATGAAGTGTGACGTT          | TGTGTTGGCATAGAGGTCTTTACG       |

**Table S4. Information on the metabolites positively correlated with individual dietary treatments (CTL, 5%, and 20%).** The metabolites are identified in the loadings plots of PLS-DA models on liver (Figure 3B), serum (Figure 3D), urine (Figure 3F), and feces (Figure 3H) after ranking all detected MS signals based on their coefficients with each dietary treatment.

| RT (min) | <i>m/z</i> | Metabolite ID*                   | Formula of original molecule                                                    | Formula of detected ion <sup>#</sup>                                                         | Positive correlation with treatment |
|----------|------------|----------------------------------|---------------------------------------------------------------------------------|----------------------------------------------------------------------------------------------|-------------------------------------|
| Liver    |            |                                  |                                                                                 |                                                                                              |                                     |
| 2.42     | 104.1076   | Choline (pos)                    | C <sub>5</sub> H <sub>13</sub> NO                                               | C <sub>5</sub> H <sub>14</sub> NO <sup>+</sup>                                               | CTL                                 |
| 1.81     | 123.0559   | Nicotinamide (pos)               | C <sub>6</sub> H <sub>6</sub> N <sub>2</sub> O                                  | C <sub>6</sub> H <sub>7</sub> N <sub>2</sub> O <sup>+</sup>                                  | CTL                                 |
| 2.69     | 136.0621   | Adenine (pos)                    | C <sub>5</sub> H <sub>5</sub> N <sub>5</sub>                                    | C <sub>5</sub> H <sub>6</sub> N <sub>5</sub> <sup>+</sup>                                    | CTL                                 |
| 2.56     | 146.1173   | 3-dehydroxycarnitine (pos)       | C <sub>7</sub> H <sub>15</sub> NO <sub>2</sub>                                  | C <sub>7</sub> H <sub>16</sub> NO <sub>2</sub> <sup>+</sup>                                  | 20%                                 |
| 2.87     | 162.1129   | Carnitine (pos)                  | C <sub>7</sub> H <sub>15</sub> NO <sub>3</sub>                                  | C <sub>7</sub> H <sub>16</sub> NO <sub>3</sub> <sup>+</sup>                                  | 20%                                 |
| 4.63     | 203.1505   | Dimethylarginine (pos)           | C <sub>8</sub> H <sub>18</sub> N <sub>4</sub> O <sub>2</sub>                    | C <sub>8</sub> H <sub>19</sub> N <sub>4</sub> O <sub>2</sub> <sup>+</sup>                    | 20%                                 |
| 2.16     | 204.1237   | Acetylcarnitine (pos)            | C <sub>9</sub> H <sub>17</sub> NO <sub>4</sub>                                  | C <sub>9</sub> H <sub>18</sub> NO <sub>4</sub> <sup>+</sup>                                  | 20%                                 |
| 5.45     | 214.0980   | MDA (HQ)                         | C <sub>3</sub> H <sub>4</sub> O <sub>2</sub>                                    | C <sub>12</sub> H <sub>12</sub> ON <sub>3</sub> <sup>+</sup>                                 | 20%                                 |
| 4.09     | 216.0636   | Glycerophosphoethanolamine (pos) | C <sub>5</sub> H <sub>14</sub> NO <sub>6</sub> P                                | C <sub>5</sub> H <sub>15</sub> NO <sub>6</sub> P <sup>+</sup>                                | 20%                                 |
| 5.85     | 242.1656   | Hexanal (HQ)                     | C <sub>6</sub> H <sub>12</sub> O                                                | C <sub>15</sub> H <sub>20</sub> N <sub>3</sub> <sup>+</sup>                                  | 20%                                 |
| 6.19     | 256.1814   | Heptanal (HQ)                    | C <sub>7</sub> H <sub>14</sub> O                                                | C <sub>16</sub> H <sub>22</sub> N <sub>3</sub> <sup>+</sup>                                  | 20%                                 |
| 2.66     | 268.1032   | Adenosine (pos)                  | C <sub>10</sub> H <sub>13</sub> N <sub>5</sub> O <sub>4</sub>                   | C <sub>10</sub> H <sub>14</sub> N <sub>5</sub> O <sub>4</sub> <sup>+</sup>                   | CTL                                 |
| 4.34     | 276.0847   | Glutaryl carnitine (pos)         | C <sub>12</sub> H <sub>21</sub> NO <sub>6</sub>                                 | C <sub>12</sub> H <sub>22</sub> NO <sub>6</sub> <sup>+</sup>                                 | 20%                                 |
| 2.34     | 298.0970   | MTA (pos)                        | C <sub>11</sub> H <sub>15</sub> N <sub>5</sub> O <sub>3</sub> S                 | C <sub>11</sub> H <sub>16</sub> N <sub>5</sub> O <sub>3</sub> S <sup>+</sup>                 | 20%                                 |
| 3.61     | 308.0918   | GSH (pos)                        | C <sub>10</sub> H <sub>17</sub> N <sub>3</sub> O <sub>6</sub> S                 | C <sub>10</sub> H <sub>18</sub> N <sub>3</sub> O <sub>6</sub> S <sup>+</sup>                 | 5%                                  |
| 4.69     | 348.0711   | AMP (pos)                        | C <sub>10</sub> H <sub>14</sub> N <sub>5</sub> O <sub>7</sub> P                 | C <sub>10</sub> H <sub>15</sub> N <sub>5</sub> O <sub>7</sub> P <sup>+</sup>                 | 5%                                  |
| 4.66     | 385.1289   | S-AMP (pos)                      | C <sub>14</sub> H <sub>18</sub> N <sub>5</sub> O <sub>11</sub> P                | C <sub>14</sub> H <sub>19</sub> N <sub>5</sub> O <sub>11</sub> P <sup>+</sup>                | 5%                                  |
| 5.62     | 611.1431   | GSSG (pos)                       | C <sub>20</sub> H <sub>32</sub> N <sub>6</sub> O <sub>12</sub> S <sub>2</sub>   | C <sub>20</sub> H <sub>33</sub> N <sub>6</sub> O <sub>12</sub> S <sub>2</sub> <sup>+</sup>   | 20%                                 |
| 7.59     | 688.1462   | Dephospho-CoA (pos)              | C <sub>21</sub> H <sub>35</sub> N <sub>7</sub> O <sub>13</sub> P <sub>2</sub> S | C <sub>21</sub> H <sub>36</sub> N <sub>7</sub> O <sub>13</sub> P <sub>2</sub> S <sup>+</sup> | 5%                                  |
| 3.82     | 780.5505   | PC(16:0/20:5) (pos)              | C <sub>44</sub> H <sub>78</sub> NO <sub>8</sub> P                               | C <sub>44</sub> H <sub>79</sub> NO <sub>8</sub> P <sup>+</sup>                               | 20%                                 |
| 4        | 782.5689   | PC(16:0/20:4) (pos)              | C <sub>44</sub> H <sub>80</sub> NO <sub>8</sub> P                               | C <sub>44</sub> H <sub>81</sub> NO <sub>8</sub> P <sup>+</sup>                               | 20%                                 |
| 4.21     | 792.5513   | PE(18:0/22:6) (pos)              | C <sub>45</sub> H <sub>78</sub> NO <sub>8</sub> P                               | C <sub>45</sub> H <sub>79</sub> NO <sub>8</sub> P <sup>+</sup>                               | 20%                                 |
| 4.16     | 834.5984   | PC(18:0/22:6) (pos)              | C <sub>48</sub> H <sub>84</sub> NO <sub>8</sub> P                               | C <sub>48</sub> H <sub>85</sub> NO <sub>8</sub> P <sup>+</sup>                               | 20%                                 |
| 6.09     | 848.7693   | TG(16:1/16:0/18:1) (pos)         | C <sub>53</sub> H <sub>98</sub> O <sub>6</sub>                                  | C <sub>53</sub> H <sub>102</sub> NO <sub>6</sub> <sup>+</sup>                                | CTL                                 |
| 6.5      | 878.8137   | TG(16:1/18:0/18:0) (pos)         | C <sub>55</sub> H <sub>104</sub> O <sub>6</sub>                                 | C <sub>55</sub> H <sub>108</sub> NO <sub>6</sub> <sup>+</sup>                                | CTL                                 |
| 6.51     | 904.8297   | TG(18:0/18:1/18:1) (pos)         | C <sub>57</sub> H <sub>106</sub> O <sub>6</sub>                                 | C <sub>57</sub> H <sub>110</sub> NO <sub>6</sub> <sup>+</sup>                                | CTL                                 |
| Serum    |            |                                  |                                                                                 |                                                                                              |                                     |
| 2.57     | 201.1119   | Sebacic acid (neg)               | C <sub>10</sub> H <sub>18</sub> O <sub>4</sub>                                  | C <sub>10</sub> H <sub>17</sub> O <sub>4</sub> <sup>-</sup>                                  | 20%                                 |
| 4.73     | 309.0909   | Glycine (DC)                     | C <sub>2</sub> H <sub>5</sub> NO <sub>2</sub>                                   | C <sub>14</sub> H <sub>17</sub> N <sub>2</sub> O <sub>4</sub> S <sup>+</sup>                 | 20%                                 |
| 5.38     | 314.2231   | Capric acid (HQ)                 | C <sub>10</sub> H <sub>20</sub> O <sub>2</sub>                                  | C <sub>19</sub> H <sub>28</sub> ON <sub>3</sub> <sup>+</sup>                                 | 20%                                 |
| 4.43     | 381.1115   | Glutamate (DC)                   | C <sub>5</sub> H <sub>9</sub> NO <sub>4</sub>                                   | C <sub>17</sub> H <sub>21</sub> N <sub>2</sub> O <sub>6</sub> S <sup>+</sup>                 | 5%                                  |
| 4.16     | 408.1705   | Arginine (DC)                    | C <sub>6</sub> H <sub>14</sub> N <sub>4</sub> O <sub>2</sub>                    | C <sub>18</sub> H <sub>26</sub> N <sub>5</sub> O <sub>4</sub> S <sup>+</sup>                 | 20%                                 |
| 4.3      | 496.3395   | LysoPC(16:0)                     | C <sub>24</sub> H <sub>50</sub> NO <sub>7</sub> P                               | C <sub>24</sub> H <sub>51</sub> NO <sub>7</sub> P <sup>+</sup>                               | CTL                                 |

|      |          |                    |                                                   |                                                                |     |
|------|----------|--------------------|---------------------------------------------------|----------------------------------------------------------------|-----|
| 4.14 | 520.3391 | LysoPC(18:2)       | C <sub>26</sub> H <sub>50</sub> NO <sub>7</sub> P | C <sub>26</sub> H <sub>51</sub> NO <sub>7</sub> P <sup>+</sup> | CTL |
| 4.41 | 522.3559 | LysoPC(18:1)       | C <sub>26</sub> H <sub>52</sub> NO <sub>7</sub> P | C <sub>26</sub> H <sub>53</sub> NO <sub>7</sub> P <sup>+</sup> | CTL |
| 4.66 | 524.3720 | LysoPC(18:0)       | C <sub>26</sub> H <sub>54</sub> NO <sub>7</sub> P | C <sub>26</sub> H <sub>55</sub> NO <sub>7</sub> P <sup>+</sup> | CTL |
| 5.93 | 671.5730 | CE(20:5) (pos)     | C <sub>47</sub> H <sub>74</sub> O <sub>2</sub>    | C <sub>47</sub> H <sub>75</sub> O <sub>2</sub> <sup>+</sup>    | 20% |
| 6.31 | 876.8007 | TG(16:0/18:1/18:1) | C <sub>55</sub> H <sub>102</sub> O <sub>6</sub>   | C <sub>55</sub> H <sub>106</sub> NO <sub>6</sub> <sup>+</sup>  | CTL |

Urine

|      |          |                                      |                                                               |                                                                              |     |
|------|----------|--------------------------------------|---------------------------------------------------------------|------------------------------------------------------------------------------|-----|
| 1.6  | 170.0804 | Pyridoxine (pos)                     | C <sub>8</sub> H <sub>11</sub> NO <sub>3</sub>                | C <sub>8</sub> H <sub>12</sub> NO <sub>3</sub> <sup>+</sup>                  | 20% |
| 3.47 | 172.0961 | Glycol-4-methyl pentanoic acid (pos) | C <sub>8</sub> H <sub>15</sub> NO <sub>3</sub>                | C <sub>8</sub> H <sub>16</sub> NO <sub>3</sub> <sup>+</sup>                  | 20% |
| 4.3  | 185.1163 | 3-oxodecanoic acid (neg)             | C <sub>10</sub> H <sub>18</sub> O <sub>3</sub>                | C <sub>10</sub> H <sub>17</sub> O <sub>3</sub> <sup>-</sup>                  | CTL |
| 4.42 | 186.1120 | Glycol-4-methyl hexanoic acid (pos)  | C <sub>9</sub> H <sub>17</sub> NO <sub>3</sub>                | C <sub>9</sub> H <sub>18</sub> NO <sub>3</sub> <sup>+</sup>                  | 20% |
| 3.21 | 187.0059 | <i>p</i> -Cresol sulfate (neg)       | C <sub>7</sub> H <sub>8</sub> O <sub>4</sub> S                | C <sub>7</sub> H <sub>7</sub> O <sub>4</sub> S <sup>-</sup>                  | 5%  |
| 2.54 | 201.1119 | Sebacic acid (neg)                   | C <sub>10</sub> H <sub>18</sub> O <sub>4</sub>                | C <sub>10</sub> H <sub>17</sub> O <sub>4</sub> <sup>-</sup>                  | 20% |
| 3.58 | 204.0647 | Indolelactic acid (neg)              | C <sub>11</sub> H <sub>11</sub> NO <sub>3</sub>               | C <sub>11</sub> H <sub>10</sub> NO <sub>3</sub> <sup>-</sup>                 | CTL |
| 1.71 | 220.1170 | Pantothenic acid (pos)               | C <sub>5</sub> H <sub>7</sub> NO <sub>3</sub>                 | C <sub>5</sub> H <sub>8</sub> NO <sub>3</sub> <sup>+</sup>                   | 20% |
| 6.23 | 254.1660 | Heptenal (HQ)                        | C <sub>7</sub> H <sub>12</sub> O                              | C <sub>16</sub> H <sub>20</sub> N <sub>3</sub> <sup>+</sup>                  | 20% |
| 3.28 | 283.0791 | <i>p</i> -Cresol glucuronide (neg)   | C <sub>13</sub> H <sub>16</sub> O <sub>7</sub>                | C <sub>13</sub> H <sub>15</sub> O <sub>7</sub> <sup>-</sup>                  | CTL |
| 4.75 | 309.0909 | Glycine (DC)                         | C <sub>2</sub> H <sub>5</sub> NO <sub>2</sub>                 | C <sub>14</sub> H <sub>17</sub> N <sub>2</sub> O <sub>4</sub> S <sup>+</sup> | CTL |
| 5.38 | 314.2231 | Capric acid (HQ)                     | C <sub>10</sub> H <sub>20</sub> O <sub>2</sub>                | C <sub>19</sub> H <sub>28</sub> ON <sub>3</sub> <sup>+</sup>                 | 20% |
| 2.99 | 377.1435 | Riboflavin (pos)                     | C <sub>17</sub> H <sub>20</sub> N <sub>4</sub> O <sub>6</sub> | C <sub>17</sub> H <sub>21</sub> N <sub>4</sub> O <sub>6</sub> <sup>+</sup>   | 20% |

Feces

|      |          |                                   |                                                   |                                                              |     |
|------|----------|-----------------------------------|---------------------------------------------------|--------------------------------------------------------------|-----|
| 8.2  | 151.0744 | Hydrocinnamic acid (pos)          | C <sub>9</sub> H <sub>10</sub> O <sub>2</sub>     | C <sub>9</sub> H <sub>11</sub> O <sub>2</sub> <sup>+</sup>   | CTL |
| 2.61 | 202.0981 | Acetic acid (HQ)                  | C <sub>2</sub> H <sub>4</sub> O <sub>2</sub>      | C <sub>11</sub> H <sub>12</sub> ON <sub>3</sub> <sup>+</sup> | 20% |
| 3.06 | 216.1137 | Propionic acid (HQ)               | C <sub>3</sub> H <sub>6</sub> O <sub>2</sub>      | C <sub>12</sub> H <sub>14</sub> ON <sub>3</sub> <sup>+</sup> | 20% |
| 3.58 | 230.1292 | Butyric acid (HQ)                 | C <sub>4</sub> H <sub>8</sub> O <sub>2</sub>      | C <sub>13</sub> H <sub>16</sub> ON <sub>3</sub> <sup>+</sup> | 20% |
| 4.64 | 244.1447 | Valeric acid (HQ)                 | C <sub>5</sub> H <sub>10</sub> O <sub>2</sub>     | C <sub>14</sub> H <sub>18</sub> ON <sub>3</sub> <sup>+</sup> | 20% |
| 7.61 | 271.2265 | 3-Hydroxy-hexadecanoic acid (neg) | C <sub>16</sub> H <sub>32</sub> O <sub>3</sub>    | C <sub>16</sub> H <sub>31</sub> O <sub>3</sub> <sup>-</sup>  | CTL |
| 6.92 | 277.2153 | $\alpha$ -Linolenic acid (neg)    | C <sub>18</sub> H <sub>30</sub> O <sub>2</sub>    | C <sub>18</sub> H <sub>29</sub> O <sub>2</sub> <sup>-</sup>  | 20% |
| 7.86 | 279.2313 | Linoleic acid (neg)               | C <sub>18</sub> H <sub>32</sub> O <sub>2</sub>    | C <sub>18</sub> H <sub>31</sub> O <sub>2</sub> <sup>-</sup>  | 20% |
| 8.18 | 281.2457 | Oleic acid (neg)                  | C <sub>18</sub> H <sub>34</sub> O <sub>2</sub>    | C <sub>18</sub> H <sub>33</sub> O <sub>2</sub> <sup>-</sup>  | 20% |
| 6.3  | 303.1205 | Indole-3-carboxylic acid (HQ)     | C <sub>9</sub> H <sub>7</sub> NO <sub>2</sub>     | C <sub>18</sub> H <sub>15</sub> ON <sub>4</sub> <sup>+</sup> | CTL |
| 8    | 305.2466 | Eicosatrienoic acid (neg)         | C <sub>20</sub> H <sub>34</sub> O <sub>2</sub>    | C <sub>20</sub> H <sub>33</sub> O <sub>2</sub> <sup>-</sup>  | CTL |
| 7.01 | 375.2892 | LCA (neg)                         | C <sub>24</sub> H <sub>40</sub> O <sub>3</sub>    | C <sub>24</sub> H <sub>39</sub> O <sub>3</sub> <sup>-</sup>  | 5%  |
| 4.8  | 391.2858 | DCA (neg)                         | C <sub>24</sub> H <sub>40</sub> O <sub>4</sub>    | C <sub>24</sub> H <sub>39</sub> O <sub>4</sub> <sup>-</sup>  | 5%  |
| 4.63 | 391.2858 | CDCA (neg)                        | C <sub>24</sub> H <sub>40</sub> O <sub>4</sub>    | C <sub>24</sub> H <sub>39</sub> O <sub>4</sub> <sup>-</sup>  | 5%  |
| 5.7  | 405.2630 | 7-Ketodeoxycholic acid (neg)      | C <sub>24</sub> H <sub>38</sub> O <sub>5</sub>    | C <sub>24</sub> H <sub>37</sub> O <sub>5</sub> <sup>-</sup>  | CTL |
| 5.47 | 407.2790 | MCA (neg)                         | C <sub>24</sub> H <sub>40</sub> O <sub>5</sub>    | C <sub>24</sub> H <sub>39</sub> O <sub>5</sub> <sup>-</sup>  | 5%  |
| 6.91 | 449.3250 | Coprocholic acid (neg)            | C <sub>27</sub> H <sub>46</sub> O <sub>5</sub>    | C <sub>27</sub> H <sub>45</sub> O <sub>5</sub> <sup>-</sup>  | CTL |
| 4.99 | 498.2889 | TCDCA (neg)                       | C <sub>26</sub> H <sub>45</sub> NO <sub>6</sub> S | C <sub>26</sub> H <sub>44</sub> NO <sub>6</sub> S            | 20% |
| 5.24 | 514.2827 | TMCA (neg)                        | C <sub>26</sub> H <sub>45</sub> NO <sub>7</sub> S | C <sub>26</sub> H <sub>44</sub> NO <sub>7</sub> S            | 20% |
| 4.91 | 514.2827 | TCA (neg)                         | C <sub>26</sub> H <sub>45</sub> NO <sub>7</sub> S | C <sub>26</sub> H <sub>44</sub> NO <sub>7</sub> S            | 20% |

|      |          |                                    |                                                                 |                                                                              |     |
|------|----------|------------------------------------|-----------------------------------------------------------------|------------------------------------------------------------------------------|-----|
| 8.32 | 567.4202 | 3-hydroxy-b,e-caroten-3'-one (pos) | C <sub>40</sub> H <sub>54</sub> O                               | C <sub>40</sub> H <sub>55</sub> O <sup>+</sup>                               | 20% |
| 6.57 | 629.2222 | Chlorophyllide b (pos)             | C <sub>35</sub> H <sub>32</sub> MgN <sub>4</sub> O <sub>6</sub> | C <sub>35</sub> H <sub>33</sub> MgN <sub>4</sub> O <sub>6</sub> <sup>+</sup> | 20% |

*\*Metabolite ID contains the compound identity and its detection mode. (pos: positive mode; neg: negative mode, DC: dansyl chloride derivatization; HQ: 2-hydrazinoquinoline derivatization.)*

*\*Formula of detected ion is the formula of charged metabolite or derivative in the MS detection.*

**Figure S1. The distribution of riboflavin and its metabolites in the liver after *Scenedesmus* feeding.** Data are presented as mean  $\pm$  SEM. *P*-values indicate overall significances across all sample groups from the one-way ANOVA test.

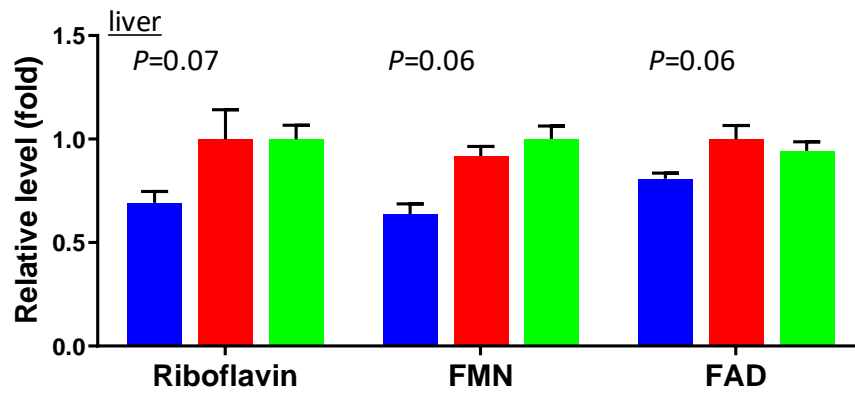



**Figure S2. Identification of lipid metabolism changes after *Scenedesmus* feeding.** **A.** Representative LC-MS chromatograms of extracted mouse liver lipids. **B.** Representative LC-MS chromatograms of extracted mouse serum lipids. **C.** HCA-based heat map on *Scenedesmus*-responsive TAGs in the liver. **D.** HCA-based heat map on *Scenedesmus*-responsive TAGs in serum.

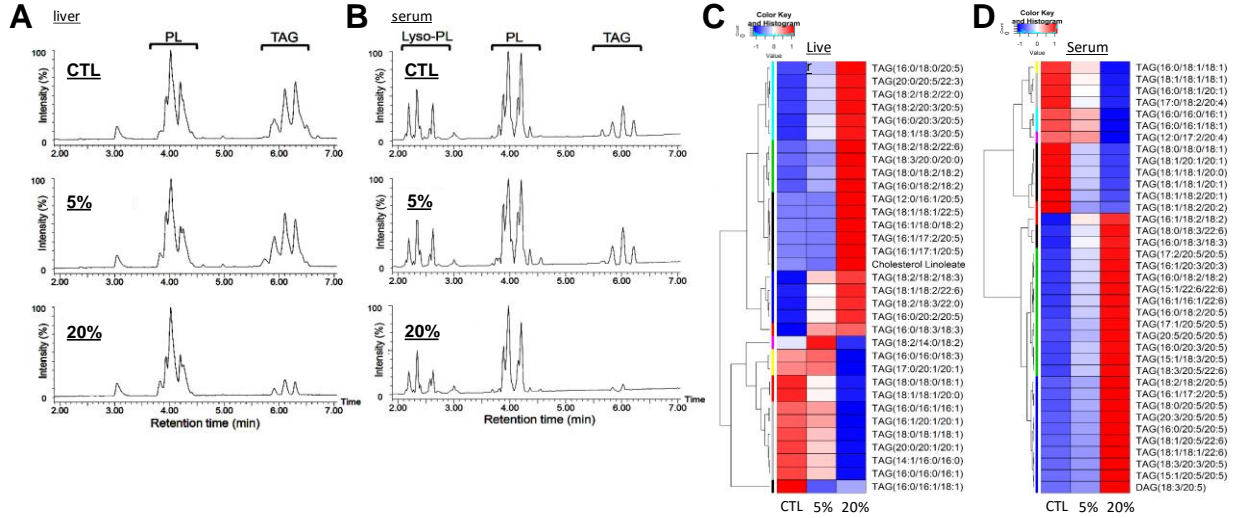

**Figure S3. *Scenedesmus*-induced changes in levels of GSH and GSSG.** A. Concentrations of GSH in the liver on day 28 of feeding. B. Concentration of GSSG in the liver. Data are presented as mean  $\pm$  SEM. *P*-values indicate overall significances across all sample groups from the one-way ANOVA test. Means with different letter labels (a, b) indicate significant differences ( $P < 0.05$ ) between two dietary treatments by the Tukey post hoc test.

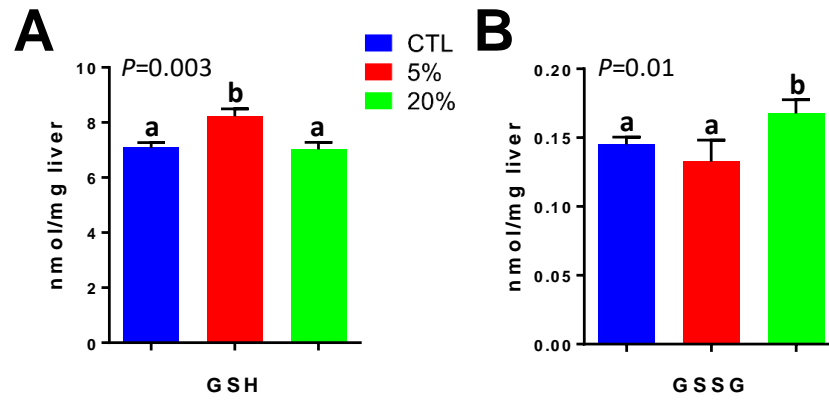

**Figure S4. *Scenedesmus*-induced changes in levels of SCFAs in feces including acetic acid, propionic acid, butyric acid and valeric acid.** Data are presented as mean  $\pm$  SEM. *P*-values indicate overall significances across all sample groups from the one-way ANOVA test. Means with different letter labels (a, b, c) indicate significant differences ( $P < 0.05$ ) between two dietary treatments by the Tukey post hoc test.

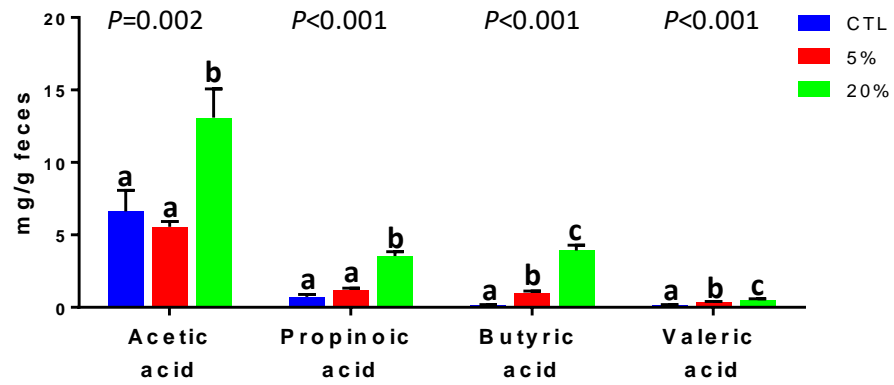

**Figure S5. *Scenedesmus*-induced changes in levels of metabolites in urea cycle.** *A.* Relative abundance of dimethylarginine in the liver on day 28 of feeding. *B.* Relative abundance of argininosuccinate in the liver. Data are presented as mean  $\pm$  SEM. *P*-values indicate overall significances across all sample groups from the one-way ANOVA test. Means with different letter labels (a, b) indicate significant differences ( $P < 0.05$ ) between two dietary treatments by the Tukey post hoc test.

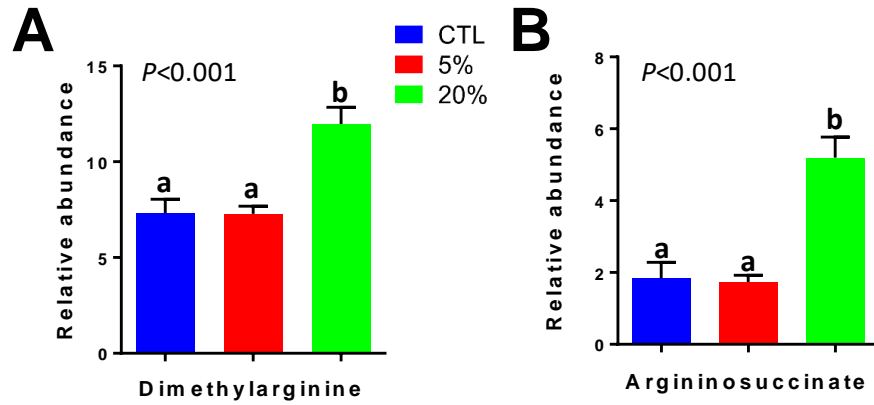

Supplement: nutrients-11-01971-s001.pdf [file nutrients-11-01971-s001.pdf]
